# Supplementary material for: A seawater desalination scheme for global hydrological models
Source: Copernicus journal article supplement (doi:10.5194/hess-20-4143-2016), 2016-10-12
Supplement: Supplementary file 1 [file hess-20-4143-2016-supplement.pdf]

Supplement of Hydrol. Earth Syst. Sci., 20, 4143–4157, 2016  
<http://www.hydrol-earth-syst-sci.net/20/4143/2016/>  
doi:10.5194/hess-20-4143-2016-supplement  
© Author(s) 2016. CC Attribution 3.0 License.

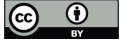

*Supplement of*

## **A seawater desalination scheme for global hydrological models**

**Naota Hanasaki et al.**

*Correspondence to:* Naota Hanasaki (hanasaki@nies.go.jp)

The copyright of individual parts of the supplement might differ from the CC-BY 3.0 licence.

1 **Supplemental Text**

2

3 **Selection criteria of desalination plants**

4 We subscribed to the DesalData (<http://www.desaldata.com>) desalination database and  
5 downloaded all of the data available as of June 2014, including information on  
6 desalination plants of various sizes, source water, and year of construction. To estimate  
7 seawater desalination globally for domestic and industrial purposes at a spatial  
8 resolution of  $0.5^{\circ} \times 0.5^{\circ}$ , we selected the data to include in our analyses. Among the  
9 many data fields available, we focused on plant status, year online, water type, user  
10 category, and plant size (see Table S2). First, we selected “online” plants and discarded  
11 those with other statuses (“construction,” “planned,” “canceled,” “on hold,” “offline,”  
12 and “unknown”). We set 2005 as the base year, and selected the plants that had started  
13 operation in 2005 or earlier. Since we focused on seawater desalination, we selected  
14 plants using “brine or concentrated seawater” and “seawater” and excluded those using  
15 other water types. Then, we selected plants producing water for “municipalities as  
16 drinking water” and “tourist facilities as drinking water,” which correspond to  
17 municipal water in the text, and “industry,” “military purposes”, and “power stations”  
18 for industrial water. We also included plants for “irrigation.” As stated in the text, at

19 least at the time of publication, desalination is seldom used for irrigation. Exceptionally,  
20 four major desalination plants were constructed for irrigation in Spain up until 2005.  
21 Plants for other purposes (demonstration, discharge, process, water injection, and  
22 unknown) were excluded. Finally, we selected plants with capacities exceeding 10,000  
23  $\text{m}^3 \text{d}^{-1}$ . This corresponds to water resources of approximately  $1.5 \text{ mm yr}^{-1}$  assuming the  
24 area of a grid cell is  $2500 \text{ km}^2$  ( $0.5^\circ \times 0.5^\circ$ ), which is the same order of magnitude as  
25 other water resource components simulated in H08. This also excluded pilot plants,  
26 since the goal of this study was to develop a model to identify regions regularly  
27 supplied by seawater desalination.

28

## 29 **Method summary in Figure 5**

30 Municipal and industrial water use in areas utilizing seawater desalination (AUSD; the  
31 horizontal axis in Figure 5) was estimated as follows. AQUASTAT reports  
32 sector-specific national water withdrawal for 5-year intervals from 1980 to 2005. We  
33 collected all of the data available for major countries. We also used the national water  
34 statistics of Qatar (MDPS, 2016), which includes a sector-specific time series record of  
35 water use. Then, we spatially distributed each record into the  $0.5^\circ \times 0.5^\circ$  grid cells by  
36 weighting population density for circa 2000. Next, we masked the gridded water

37 withdrawal by AUSD in 2005, and estimated the total municipal and industrial water  
38 withdrawal in AUSD. Finally, using the project completion year in DesalData, we  
39 obtained the total desalination capacity (the vertical axis in Figure 5) for each country  
40 and period. AUSD was fixed at 2005 assuming that climate conditions were unchanged.

41

#### 42 **Estimation of unit production cost**

43 We used information on the engineering procurement and construction costs  
44 [hereafter EPC] for the 173 major plants reported in DesalData. First, we examined  
45 whether there were any clear tendencies pertaining to costs among countries, regions,  
46 user categories, or years of construction. We found distinct differences in the costs of  
47 membrane processes (e.g., reverse osmosis and electrodialysis) and thermal  
48 technologies (e.g., multi-stage flash and multi-efficient distillation). In the future  
49 simulation, we assumed that new plants would use membrane processes because of their  
50 greater efficiency.

51 Lamei *et al.* (2008) estimated the unit production cost (0.86–3.21 USD m<sup>-3</sup>) for  
52 membrane desalination plants in Egypt, Saudi Arabia, and several other countries. The  
53 unit production cost includes the unit capital cost and operation and maintenance costs  
54 (O&M cost; including the costs for pre- and post-treatment chemicals, membrane

55 replacement, energy, labor, brine disposal, and administration divided by the annual  
56 plant production). The former is defined as the annualized EPC divided by the plant  
57 capacity. As the latter is seldom reported, the O&M cost was assumed to be 150% of  
58 the unit capital cost based on a literature survey, which assumed a plant life of 20 years  
59 and a discount rate of 8%. Adopting their methodology, we estimated the unit  
60 production cost at 0.40–3.78 USD m<sup>-3</sup> from the EPC of 63 plants using membrane  
61 process desalination.

62

63

64

65 Supplemental Figures

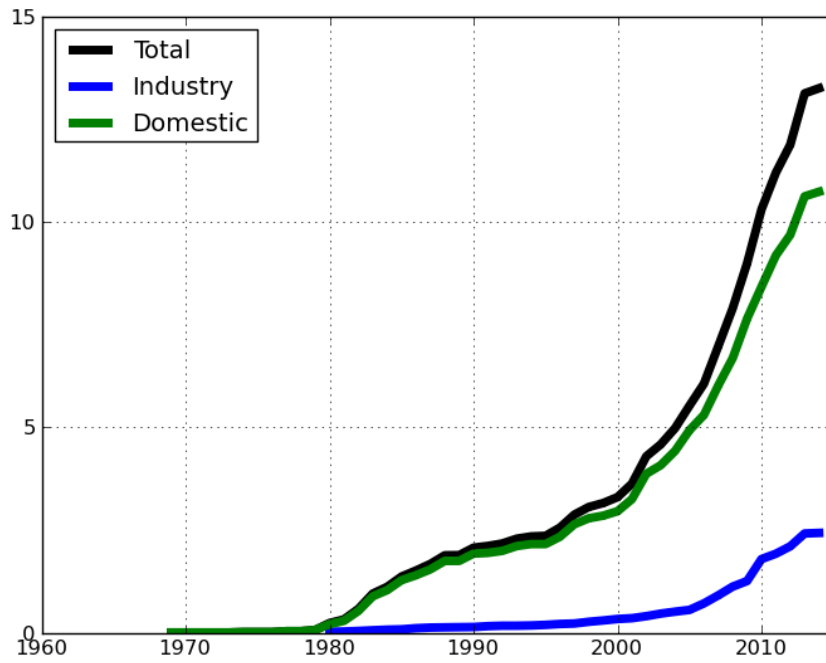

66

67 **Figure S1.** Historical change in the global total seawater desalination capacity

68 (km³ yr⁻¹).

69

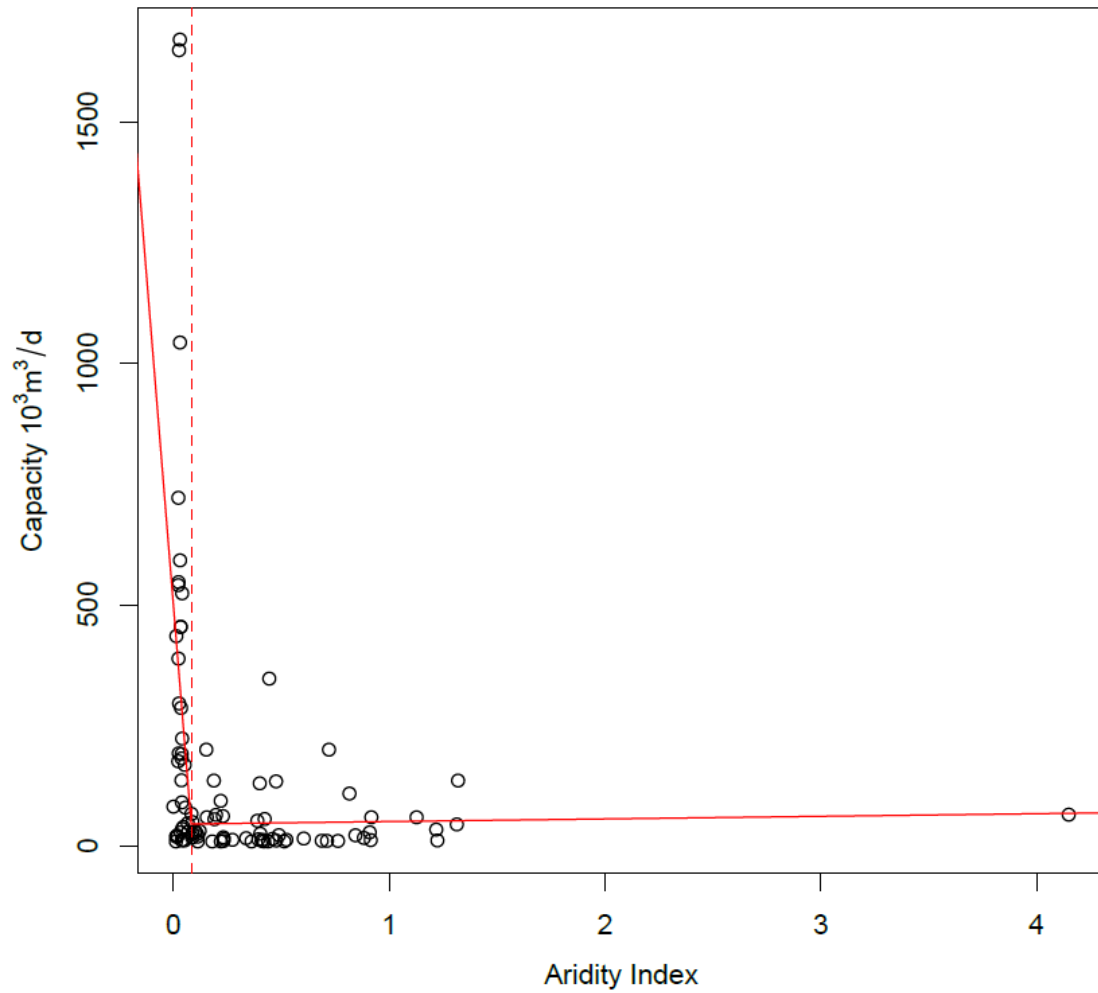

71

72 **Figure S2.** The relationship between the aridity index and capacity of desalination  
73 plants using the results for 94 grid cells. Red lines show the regressions obtained by  
74 applying the segmented regression method. Dashed line represents the break point  
75 (Aridity index= 0.082).

76

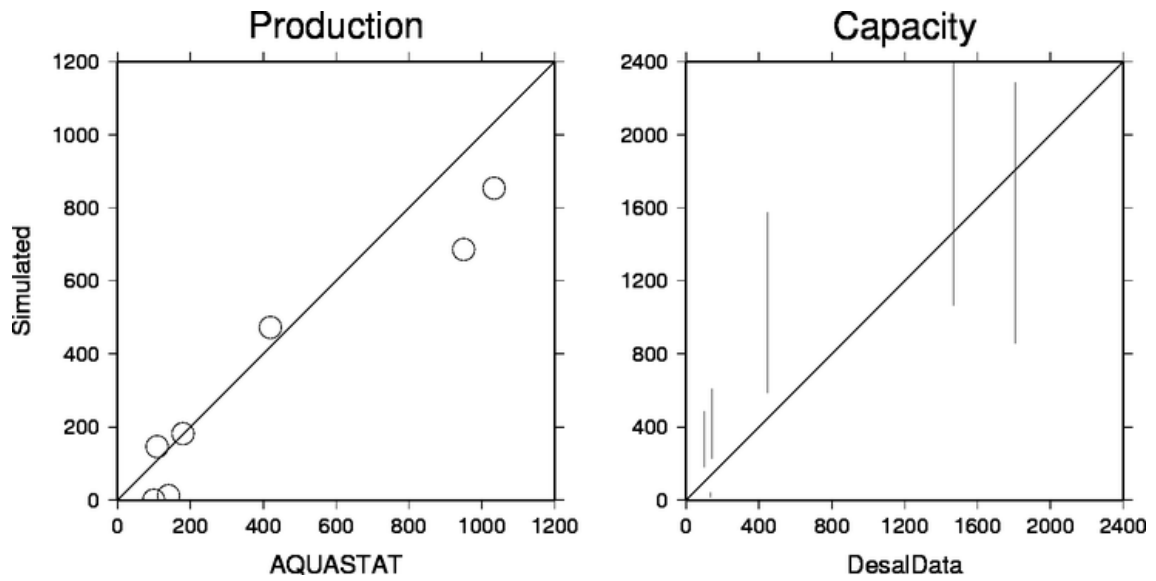

78

79 **Figure S3.** Production of seawater desalination and capacity of the major countries  
 80 shown in Table 1 ( $10^6 \text{ m}^3 \text{ yr}^{-1}$ ). The range of simulated capacity shows the uncertainty in  
 81 the production-to-capacity ratio, which is assumed to be 30–80% in this study.

82



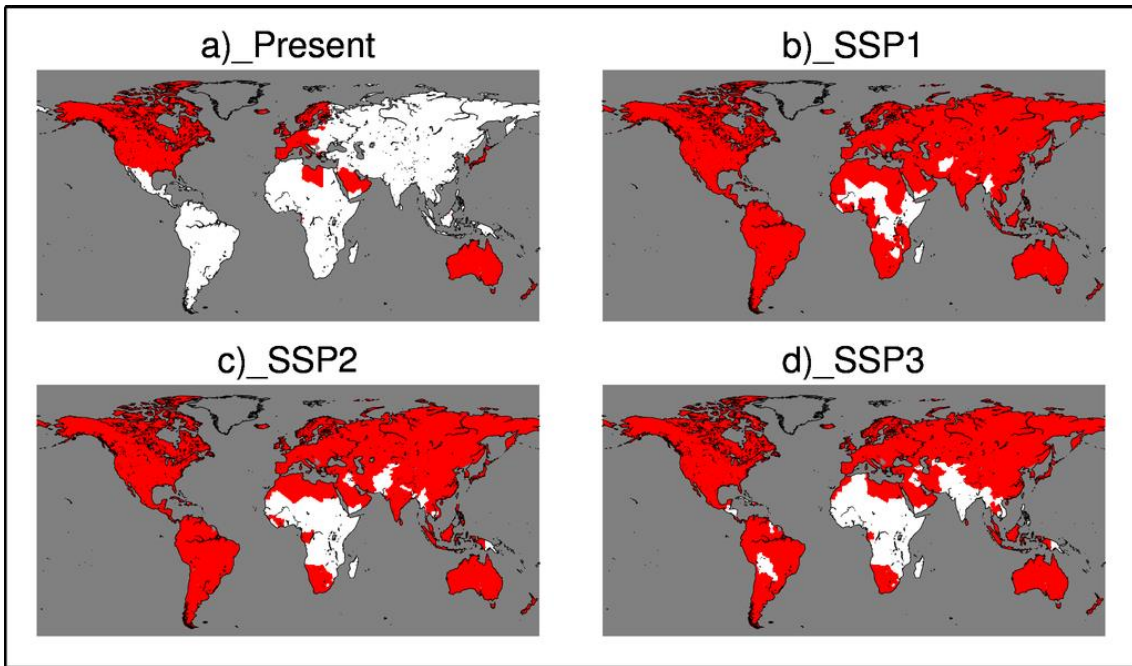

84

85 **Figure S4.** Countries with a per capita gross domestic product (GDP) exceeding 14,000

86 USD purchasing power parity (PPP) per capita.

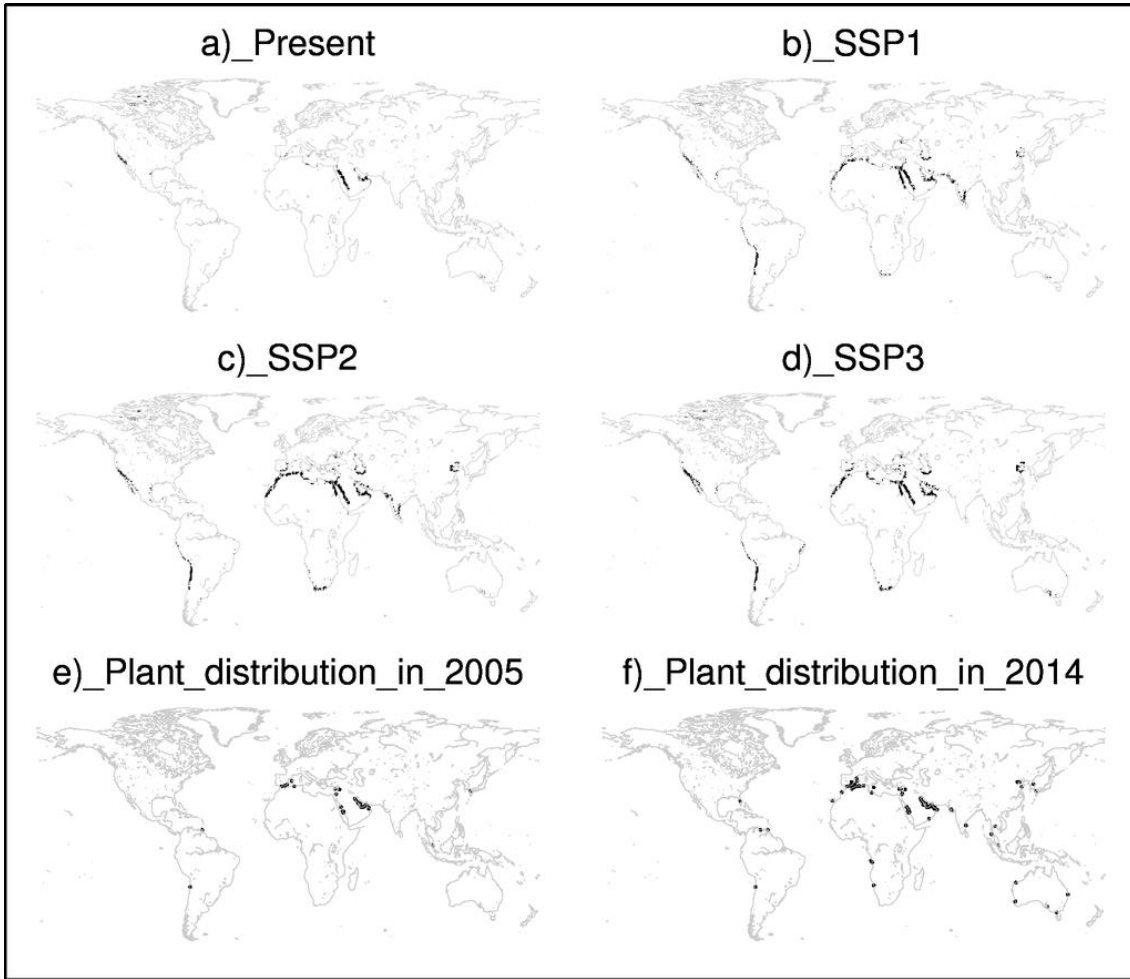

87

88 **Figure S5.** Global distributions of areas utilizing seawater desalination (AUSD) using  
 89 SDM2 in (a) 2005, (b) SSP1 in 2055, (c) SSP2 in 2055, and (d) SSP3 in 2055.

90 Locations of seawater desalination plants larger than 50,000 m<sup>3</sup> day<sup>-1</sup> in capacity in

91 (e) 2005 and (f) 2014.

92

93

94 **Supplemental Tables**95 **Table S1** Data items and selection

| Items        | Options                                                                                                                                                                                                                                                                                          | Selection |
|--------------|--------------------------------------------------------------------------------------------------------------------------------------------------------------------------------------------------------------------------------------------------------------------------------------------------|-----------|
| Plant status | Online, Presumed online                                                                                                                                                                                                                                                                          | Included  |
|              | Construction, Planned, Canceled, On hold, Offline, Unknown                                                                                                                                                                                                                                       | Excluded  |
| Water type   | Brine or concentrated seawater (TDS > 50,000 ppm),<br>Seawater (TDS 20,000–50,000 ppm)                                                                                                                                                                                                           | Included  |
|              | Brackish water or inland water (TDS 3000 to < 20,000 ppm),<br>River water or low concentrated saline water (TDS 500 to < 3000 ppm),<br>Pure water or tap water (TDS <500 ppm),<br>Waste water, Unknown                                                                                           | Excluded  |
|              | Municipalities as drinking water (TDS 10 to <1000 ppm),<br>Tourist facilities as drinking water (TDS 10 to <1000 ppm),<br>Industry (TDS <10 ppm),<br>Military purposes (TSD 10 to < 1000 ppm),<br>Power stations (TDS < 10 ppm),<br>Irrigation (TDS < 1000 ppm)                                  | Included  |
|              | Demonstration, Discharge, Process, Water injection, Unknown                                                                                                                                                                                                                                      | Excluded  |
|              | Extra-large (Capacity $\geq 50,000 \text{ m}^3 \text{ d}^{-1}$ ),<br>Large ( $50,000 > \text{Capacity} \geq 10,000 \text{ m}^3 \text{ d}^{-1}$ )<br>Medium ( $10,000 > \text{Capacity} \geq 1000 \text{ m}^3 \text{ d}^{-1}$ ),<br>Small ( $1000 \text{ m}^3 \text{ d}^{-1} > \text{Capacity}$ ) | Excluded  |

96

97

98 **Table S2** Excluded desalination plants and reasons for their exclusion. 1 and 2 in the  
99 column Reasons for exclusion indicate substantially far from the seashore (distance  
100 from the seashore) and apparent inconsistency in location records (name of city,  
101 country, longitude/latitude do not match), respectively.

| Name of plant                                                      | Country | Reasons for exclusion |
|--------------------------------------------------------------------|---------|-----------------------|
| O.I. SW 12.500                                                     | Algeria | 1 (910 km)            |
| Block 31 Field                                                     | Angola  | 1 (529 km) and 2      |
| Kizomba A                                                          | Angola  | 1 (831 km) and 2      |
| Kizomba B                                                          | Angola  | 1 (831 km) and 2      |
| Pazflor FPSO                                                       | Angola  | 1 (529 km) and 2      |
| Pazflor FPSO                                                       | Angola  | 1 (529 km) and 2      |
| Plutao, Saturno, Venus, and Marte (PSVM)                           | Angola  | 1 (529 km) and 2      |
| P63                                                                | Brazil  | 1 (946 km) and 2      |
| Petrobras P57                                                      | Brazil  | 1 (946 km) and 2      |
| Revap                                                              | Brazil  | 1 (946 km) and 2      |
| RLAM ETA                                                           | Brazil  | 1 (946 km) and 2      |
| Sao Paulo                                                          | Brazil  | 1 (946 km) and 2      |
| SBM Cidade De Paraty                                               | Brazil  | 1 (946 km) and 2      |
| Tupi 2                                                             | Brazil  | 1 (946 km) and 2      |
| China Petroleum & Chemical Corporation Methanol Filtration Project | China   | 1 (1449 km) and 2     |
| Huanghua                                                           | China   | 1 (897 km) and 2      |
| Iron & Steel Group Wastewater Reuse Project                        | China   | 1 (1449 km) and 2     |
| Pinghai Power Plant                                                | China   | 1 (1449 km) and 2     |
| Rongcheng                                                          | China   | 1 (751 km) and 2      |
| Yan Hu Lan Ke SWRO Plant                                           | China   | 1 (1449 km) and 2     |

102

103

| Name of plant        | Country      | Reasons for exclusion |
|----------------------|--------------|-----------------------|
| Yin Kou              | China        | 1 (1449 km) and 2     |
| YueQing              | China        | 1 (782 km) and 2      |
| Yuhuan               | China        | 1 (782 km) and 2      |
| India                | India        | 1 (472 km) and 2      |
| Santej               | India        | 1 (430 km) and 2      |
| Iran                 | Iran         | 1 (380 km)            |
| Kensalt              | Kenya        | 1 (439 km) and 2      |
| Soussa               | Libya        | 1 (405 km) and 2      |
| Soussa II            | Libya        | 1 (405 km) and 2      |
| Zuetina II           | Libya        | 1 (492 km) and 2      |
| Russia               | Russia       | 1 (1473 km)           |
| Russia               | Russia       | 1 (1473 km)           |
| Tobolsk              | Russia       | 1 (918 km)            |
| Tobolsk              | Russia       | 1 (918 km)            |
| Tobolsk              | Russia       | 1 (918 km)            |
| Al Hota              | Saudi Arabia | 1 (388 km)            |
| Al Qurayyah          | Saudi Arabia | 1(533km) and 2        |
| Assir                | Saudi Arabia | 1 (183 km)            |
| Assir                | Saudi Arabia | 1 (183 km)            |
| PP11                 | Saudi Arabia | 1 (388 km)            |
| Riyadh               | Saudi Arabia | 1 (388 km)            |
| Shas Water Treatment | Saudi Arabia | 1 (388 km)            |
| Sureste 1            | Spain        | 2                     |

| Name of plant         | Country      | Reasons for exclusion* |
|-----------------------|--------------|------------------------|
| Sureste 2             | Spain        | 2                      |
| Tenerife              | Spain        | 1 (307 km)             |
| Colakoglu             | Turkey       | 1 (277 km) and 2       |
| Eren Eneril           | Turkey       | 1 (184 km) and 2       |
| Eren Project          | Turkey       | 1 (247 km) and 2       |
| Nuh Cimento expansion | Turkey       | 1 (197 km)             |
| Steel Mill MMK Atakas | Turkey       | 1 (194 km)             |
| Turkmenistan          | Turkmenistan | 1 (596 km)             |
| Mobile Unit           | U.S.A.       | 1 (1178 km)            |
| U.S.A.                | U.S.A.       | 1 (1178 km)            |
| Yuzhniy               | Ukraine      | 1 (347 km) and 2       |

109 **Table S3** The number of desalination plants and their capacity sorted by categories.

110 Size, Type, Status, and User stand for Plant status, Water type, User category, and

111 Plant size in Table S1. O/PO in Status and MTIMPI in User stand for Online and

112 presumed online, Municipalities Tourist facilities, Industry, Military purposes,

113 Power stations, and Irrigation in Table S1. QC stands for quality check of location of

114 plants, or exclusion of erroneous records listed in Table S2.

| Size  | Type     | Status | User   | QC  | Number    | Capacity                            | Number    | Capacity                            | Number    | Capacity                            |
|-------|----------|--------|--------|-----|-----------|-------------------------------------|-----------|-------------------------------------|-----------|-------------------------------------|
|       |          |        |        |     | of plants | [km <sup>3</sup> yr <sup>-1</sup> ] | of plants | [km <sup>3</sup> yr <sup>-1</sup> ] | of plants | [km <sup>3</sup> yr <sup>-1</sup> ] |
|       |          |        |        |     | 1990      | 2005                                |           | 2014                                |           |                                     |
| All   | All      | All    | All    | No  | 5,594     | 5.4                                 | 12,204    | 14.6                                | 17,335    | 31.4                                |
| All   | All      | O/PO   | All    | No  | 1,830     | 3.1                                 | 8,418     | 12.1                                | 13,368    | 26.1                                |
| All   | Seawater | All    | All    | No  | 1,583     | 3.5                                 | 3,813     | 8.1                                 | 5,673     | 19.2                                |
| All   | Seawater | O/PO   | All    | No  | 726       | 2.4                                 | 2,946     | 6.9                                 | 4,708     | 15.7                                |
| L, XL | Seawater | O/PO   | MTIMPI | Yes | 65        | 1.9                                 | 240       | 5.3                                 | 559       | 12.7                                |

116 **Table S4** Regional classification

| Region                           | Countries (ISO 3166-1 alpha 3)                                                                                                                                                                    |
|----------------------------------|---------------------------------------------------------------------------------------------------------------------------------------------------------------------------------------------------|
| Sub-Saharan Africa               | AGO BDI BEN BFA BWA CAF CIV CMR COD COG COM CPV DJI ERI ETH GAB GHA GIN GMB GNB GNQ<br>KEN LBR LSO MDG MLI MOZ MRT MUS MWI NAM NER NGA RWA SEN SLE SOM STP SWZ SYC TCD<br>TGO TZA UGA ZAF ZMB ZWE |
| Centrally Planned Asia and China | CHN HKG KHM LAO MAC MNG VNM                                                                                                                                                                       |
| Central and Eastern Europe       | ALB BGR BIH CZE EST HRV HUN LTU LVA MKD MNE POL ROU SRB SVK SVN                                                                                                                                   |
| Former Soviet Union              | ARM AZE BLR GEO KAZ KGZ MDA RUS TJK TKM UKR UZB                                                                                                                                                   |
| Latin America and the Caribbean  | ARG ATG BHS BLZ BOL BRA BRB CHL COL CRI DMA DOM ECU GRD GTM GUY HND HTI JAM KNA<br>LCA MEX NIC PAN PER PRY SLV SUR TTO URY VCT VEN                                                                |
| Middle East and North Africa     | ARE BHR DZA EGY IRN IRQ ISR JOR KWT LBN LBY MAR OMN QAT SAU SDN SYR TUN YEM                                                                                                                       |
| North America                    | CAN USA                                                                                                                                                                                           |
| Pacific OECD                     | AUS JPN NZL                                                                                                                                                                                       |
| Other Pacific Asia               | BRN FJI FSM IDN KIR KOR MMR MYS PHL PLW PNG SGP SLB THA TON VUT WSM                                                                                                                               |
| South Asia                       | AFG BGD BTN IND LKA MDV NPL PAK                                                                                                                                                                   |
| Western Europe                   | AUT BEL CHE CYP DEU DNK ESP FIN FRA GBR GRC IRL ISL ITA LUX MLT NLD NOR PRT SWE TUR                                                                                                               |

117

118



119 **Table S5** Desalination cost [ $10^6$  USD yr<sup>-1</sup>]. See Table S4 for the classification of countries.

| Region                           | 2005         | 2025         |              |              | 2055         |                |                |
|----------------------------------|--------------|--------------|--------------|--------------|--------------|----------------|----------------|
|                                  |              | SSP1         | SSP2         | SSP3         | SSP1         | SSP2           | SSP3           |
| Sub-Saharan Africa               | 0–0          | 2–17         | 3–25         | 3–27         | 76–716       | 67–635         | 24–231         |
| Centrally Planned Asia and China | 0–0          | 0–0          | 0–0          | 0–0          | 0–0          | 0–0            | 0–0            |
| Central and Eastern Europe       | 0–0          | 0–0          | 0–0          | 0–0          | 0–0          | 0–0            | 0–0            |
| Former Soviet Union              | 0–0          | 7–66         | 9–82         | 13–119       | 5–50         | 17–158         | 21–203         |
| Latin America and the Caribbean  | 0–0          | 463–4,374    | 577–5,448    | 686–6,484    | 390–3,686    | 738–6,977      | 1,158–10,947   |
| Middle East and North Africa     | 956–9,030    | 982–9,277    | 1,341–12,675 | 1,475–13,943 | 6,098–57,626 | 15,044–142,166 | 17,956–169,683 |
| North America                    | 163–1,545    | 163–1,536    | 207–1,955    | 232–2,188    | 124–1,174    | 255–2,412      | 290–2,742      |
| Pacific OECD                     | 3–31         | 4–39         | 2–16         | 3–32         | 2–18         | 1–10           | 5–46           |
| Other Pacific Asia               | 0–0          | 0–0          | 0–0          | 0–0          | 0–0          | 0–0            | 0–0            |
| South Asia                       | 0–0          | 0–0          | 0–0          | 0–0          | 786–7,425    | 0–0            | 0–0            |
| Western Europe                   | 0–0          | 0–0          | 0–0          | 0–0          | 0–0          | 0–0            | 0–0            |
| Global                           | 1,122–10,606 | 1,620–15,310 | 2,138–20,201 | 2,412–22,793 | 7,481–70,695 | 16,123–152,358 | 19,455–183,851 |

121 **Table S6** Desalination cost as fraction of regional or global GDP [%]. See Table S4 for the classification of countries.

| Region                           | 2005        | 2025        |             |             | 2055        |             |             |
|----------------------------------|-------------|-------------|-------------|-------------|-------------|-------------|-------------|
|                                  |             | SSP1        | SSP2        | SSP3        | SSP1        | SSP2        | SSP3        |
| Sub-Saharan Africa               | 0–0         | 0–0         | 0–0.001     | 0–0.001     | 0–0.003     | 0–0.004     | 0–0.002     |
| Centrally Planned Asia and China | 0–0         | 0–0         | 0–0         | 0–0         | 0–0         | 0–0         | 0–0         |
| Central and Eastern Europe       | 0–0         | 0–0         | 0–0         | 0–0         | 0–0         | 0–0         | 0–0         |
| Former Soviet Union              | 0–0         | 0–0.001     | 0–0.002     | 0–0.002     | 0–0         | 0–0.002     | 0–0.003     |
| Latin America and the Caribbean  | 0–0         | 0.005–0.044 | 0.006–0.055 | 0.007–0.065 | 0.002–0.015 | 0.003–0.033 | 0.007–0.065 |
| Middle East and North Africa     | 0.032–0.306 | 0.014–0.133 | 0.019–0.181 | 0.021–0.202 | 0.03–0.286  | 0.084–0.791 | 0.121–1.147 |
| North America                    | 0.001–0.011 | 0.001–0.007 | 0.001–0.009 | 0.001–0.011 | 0–0.003     | 0.001–0.008 | 0.001–0.011 |
| Pacific OECD                     | 0–0.001     | 0–0.001     | 0–0         | 0–0.001     | 0–0         | 0–0         | 0–0.001     |
| Other Pacific Asia               | 0–0         | 0–0         | 0–0         | 0–0         | 0–0         | 0–0         | 0–0         |
| South Asia                       | 0–0         | 0–0         | 0–0         | 0–0         | 0.001–0.014 | 0–0         | 0–0         |
| Western Europe                   | 0–0         | 0–0         | 0–0         | 0–0         | 0–0         | 0–0         | 0–0         |
| Global                           | 0.002–0.019 | 0.001–0.012 | 0.002–0.017 | 0.002–0.020 | 0.002–0.022 | 0.006–0.060 | 0.011–0.100 |
